# Supplementary material for: Real-world impact of antifibrotics on prognosis in patients with progressive fibrosing interstitial lung disease
Source: HighWire-hosted journal article supplement (doi:10.1136/rmdopen-2022-002667), 2023-01-01
Supplement: rmdopen-2022-002667supp001_data_supplement.pdf [file rmdopen-2022-002667supp001_data_supplement.pdf]

**Supplemental Table S1.**

| Cause                                                        | IPF* (n=22) |
|--------------------------------------------------------------|-------------|
| Discontinuation for adverse event or emerging complications  | 4           |
| Cardiac disease                                              | 1           |
| Kidney injury                                                | 1           |
| Rash                                                         | 1           |
| Lung injury                                                  | 1           |
| Patient's request owing to concerns regarding side effects   | 6           |
| Social problem <sup>1</sup>                                  | 2           |
| The medical judgment of the attending physician <sup>2</sup> | 4           |
| Others <sup>3</sup>                                          | 6           |

**Supplemental Table S1.** The reason for no antifibrotic therapy in IPF patients during the study period.

<sup>1</sup> Financial burden.

<sup>2</sup> Considered elderly.

<sup>3</sup> Unknown or unable to confirm whether options for antifibrotic agents were presented.

\*Abbreviations: IPF, idiopathic pulmonary fibrosis.

**Supplemental Table S2.**

|                   | PF-ILD*         |                        |                                   |             | Non-IPF          |                        |                                |            |
|-------------------|-----------------|------------------------|-----------------------------------|-------------|------------------|------------------------|--------------------------------|------------|
|                   | Total<br>(n=64) | IPF                    |                                   | P<br>value§ | Total<br>(n=103) | Non-IPF                |                                | P<br>value |
|                   |                 | Antifibrotic<br>(n=42) | Without<br>antifibrotic<br>(n=22) |             |                  | Antifibrotic<br>(n=34) | Without antifibrotic<br>(n=69) |            |
| Glucocorticoids   | 22 (34.38)      | 10 (23.81)             | 12 (54.55)                        | 0.0139      | 61 (59.22)       | 16 (47.06)             | 45 (65.22)                     | 0.0911     |
| Immunosuppressant | 5 (7.81)        | 1 (2.38)               | 4 (18.18)                         | 0.0437      | 22 (21.36)       | 7 (20.59)              | 15 (21.74)                     | 1.000      |

**Supplemental Table S2.** Immunosuppressive agents received during the study period in IPF and non-IPF.

‡Data are shown as n (%).

§Differences were assessed using the  $\chi^2$  test or Fisher's exact test, as appropriate.

\*Abbreviations: PF-ILD, progressive fibrosing interstitial lung disease; IPF, idiopathic pulmonary fibrosis.

**Supplemental Table S3.**

|                   | Total<br>(n=167) | IPF<br>(n=64) | PF-ILD*                                                                                     |                                                                                                |               |              |                              | P value§ |
|-------------------|------------------|---------------|---------------------------------------------------------------------------------------------|------------------------------------------------------------------------------------------------|---------------|--------------|------------------------------|----------|
|                   |                  |               | Non-IPF (n=103)                                                                             |                                                                                                | IPAF<br>(n=7) | HP<br>(n=10) | Others <sup>3</sup><br>(n=6) |          |
|                   |                  |               | IIPs other than IPF (n=49)<br>NSIP (n=19), PPFE (n=2),<br>Unclassified (n=26),<br>COP (n=2) | CTD-ILD (n=31)<br>SSc (n=12),<br>RA (n=8), IM <sup>1</sup> (n=7),<br>Others <sup>2</sup> (n=4) |               |              |                              |          |
| Glucocorticoids   | 83 (49.7)        | 22 (34.38)    | 26 (53.06)                                                                                  | 24 (77.42)                                                                                     | 4 (57.14)     | 6 (60.0)     | 1 (16.66)                    | 0.0011   |
| Immunosuppressant | 27 (16.17)       | 5 (7.81)      | 7 (14.29)                                                                                   | 14 (45.16)                                                                                     | 1 (14.29)     | 0 (0.0)      | 0 (0.0)                      | <0.0001  |

**Supplemental Table S3.** Immunosuppressive agents received during the study period in each disease groups.

<sup>1</sup>Dermatomyositis (n=4), Polymyositis (n=3)

<sup>2</sup>Microscopic Polyangiitis (n=2), Mixed Connective Tissue Disease (n=1), Systemic lupus erythematosus (n=1).

<sup>3</sup>Exposure-related ILD (n=5), Sarcoidosis (n=1)

<sup>‡</sup>Data are shown as n (%).

<sup>§</sup>Differences were assessed using the  $\chi^2$  test or Fisher's exact test, as appropriate.

Abbreviations: PF-ILD, progressive fibrosing interstitial lung disease; IPF, idiopathic pulmonary fibrosis; IIPs, idiopathic interstitial pneumonias; NSIP, non-specific interstitial pneumonia; PPFE, pleuroparenchymal fibroelastosis; COP, cryptogenic organizing pneumonia; CTD-ILD, connective tissue disease-interstitial lung disease; SSc, systemic sclerosis; IM, inflammatory myopathies; RA, rheumatoid arthritis; IPAF, interstitial pneumonia with autoimmune features; HP, hypersensitivity pneumonitis.

**Supplemental Table S4.**

| Immunosuppressant     | IPF* (n=5) | Non-IPF (n=22) |
|-----------------------|------------|----------------|
| Cyclosporine A        | 5          | 12             |
| Mycophenolate mofetil | 0          | 9              |
| Cyclophosphamide      | 1          | 3              |
| Tacrolimus            | 0          | 3              |
| Azathioprine          | 0          | 2              |
| Tocilizumab           | 0          | 3              |

|                                       | Glucocorticoid | Cyclosporine A | Mycophenolate mofetil | Cyclophosphamide | Tacrolimus | Azathioprine | Tocilizumab |
|---------------------------------------|----------------|----------------|-----------------------|------------------|------------|--------------|-------------|
| Systemic sclerosis (n=12)             | 10             | 1              | 7                     | 2                | 0          | 1            | 3           |
| Rheumatoid arthritis (n=8)            | 5              | 2              | 0                     | 0                | 0          | 0            | 0           |
| Dermatomyositis (n=4)                 | 2              | 0              | 0                     | 0                | 0          | 0            | 0           |
| Polymyositis (n=3)                    | 3              | 1              | 0                     | 0                | 1          | 0            | 0           |
| Microscopic Polyangiitis (n=2)        | 2              | 0              | 0                     | 1                | 0          | 0            | 0           |
| Mixed Connective Tissue Disease (n=1) | 1              | 0              | 0                     | 0                | 0          | 0            | 0           |
| Systemic lupus erythematosus (n=1)    | 1              | 1              | 0                     | 0                | 0          | 0            | 0           |

**Supplemental Table S4.** The details of immunosuppressant received during the study period in in IPF and non-IPF, CTD-ILDs.

\*Abbreviations: IPF, idiopathic pulmonary fibrosis; CTD-ILD, connective tissue disease-interstitial lung disease.

## Supplemental Table S5.

| Characteristics                                         | Excluded                                                                                       |                                                                                         | PF-ILD*             | P value§ |
|---------------------------------------------------------|------------------------------------------------------------------------------------------------|-----------------------------------------------------------------------------------------|---------------------|----------|
|                                                         | Non-PF-ILD (n=383)                                                                             | Low %FVC (<45%) (n=20)                                                                  | Total (n=167)       |          |
|                                                         | IPF (n=46), IIPs other than IPF (n=137), CTD-ILD (n=144), HP (n=9), IPAF (n=27), others (n=20) | IPF (n=1), IIPs other than IPF (n=7), CTD-ILD (n=7), HP (n=1), IPAF (n=3), others (n=1) |                     |          |
| Sex, male                                               | 205 (53.51) ‡                                                                                  | 11 (55.0)                                                                               | 115 (68.86)         | 0.0035   |
| Age (years)                                             | 68 (61.0-74.0)                                                                                 | 52 (43.25-65.25)                                                                        | 68.5 (62.5-72.0)    | <0.0001  |
| BMI                                                     | 22.76 (20.89-24.85)                                                                            | 23.20 (19.46-25.83)                                                                     | 22.84 (21.22-25.33) | 0.8181   |
| COPD                                                    | 58 (15.85)                                                                                     | 0 (0.0)                                                                                 | 20 (13.07)          | 0.1385   |
| DM                                                      | 90 (24.66)                                                                                     | 3 (16.67)                                                                               | 24 (14.37)          | 0.1112   |
| CTD-ILD                                                 | 144 (37.6)                                                                                     | 7 (35.00)                                                                               | 31 (18.56)          | <0.001   |
| <b>Serological examination</b>                          |                                                                                                |                                                                                         |                     |          |
| Monocyte count                                          | 401.3 (300.-520.6)                                                                             | 456.5 (329.4-571.4)                                                                     | 400.8 (319.5-508.3) | 0.6033   |
| LDH                                                     | 210 (183-245.8)                                                                                | 253 (211.5-336.8)                                                                       | 219 (192-246.5)     | 0.0078   |
| KL-6                                                    | 658 (389.8-1126.3)                                                                             | 1115 (791.18-3363.3)                                                                    | 922 (510-1310)      | <0.0001  |
| CRP                                                     | 0.04 (0.1-0.32)                                                                                | 0.33 (0.11-0.44)                                                                        | 0.13 (0.05-0.35)    | 0.1690   |
| <b>Pulmonary function</b>                               |                                                                                                |                                                                                         |                     |          |
| FVC                                                     | 2.6 (1.97-3.22)                                                                                | 1.36 (1.05-1.52)                                                                        | 2.61 (2.08-3.14)    | <0.0001  |
| %FVC                                                    | 86.4 (71.9-92.9)                                                                               | 38.75 (34.48-42.55)                                                                     | 83.3 (71.9-92.9)    | <0.0001  |
| DLCO (n=402)                                            | 10.93 (8.05-14.74)                                                                             | 3.95 (1.73-6.59)                                                                        | 10.07 (7.47-12.0)   | <0.0001  |
| %DLCO (n=402)                                           | 66.5 (48.2-82.1)                                                                               | 20.2 (10.35-35.75)                                                                      | 61.75 (47.8-76.32)  | <0.0001  |
| <b>Radiological findings</b>                            |                                                                                                |                                                                                         |                     |          |
| Honeycombing                                            | 70 (18.28)                                                                                     | 4 (20.0)                                                                                | 65 (38.92)          | <0.0001  |
| Traction bronchiectasis                                 | 170 (44.39)                                                                                    | 12 (60.0)                                                                               | 101 (60.48)         | 0.0010   |
| <b>Immunosuppressive agents during the study period</b> |                                                                                                |                                                                                         |                     |          |
| Glucocorticoids                                         | 192 (50.13)                                                                                    | 15 (75.0)                                                                               | 82 (49.1)           | <0.0001  |
| Immunosuppressant                                       | 115 (30.03)                                                                                    | 12 (60.0)                                                                               | 28 (16.77)          | <0.0001  |
| <b>Outcome</b>                                          |                                                                                                |                                                                                         |                     |          |
| Death                                                   | 35 (9.49)                                                                                      | 2 (10.53)                                                                               | 52 (31.14)          | <0.001   |

Supplemental Table S5. Characteristics of excluded patients and PF-ILD patients at first visit.

‡Data are shown as n (%) or median (interquartile range).

§Differences among continuous variables were assessed using the Kruskal-Wallis test; differences among categorical variables were assessed using the  $\chi^2$  test or Fisher's exact test, as appropriate. The Steel-Dwass test for multiple comparisons was used for statistical analyses of three or more groups.

\*Abbreviations: PF-ILD, progressive fibrosing interstitial lung disease; IPF, idiopathic pulmonary fibrosis; IIPs, idiopathic interstitial pneumonias; CTD-ILD, connective tissue disease-interstitial lung disease; IPAF, interstitial pneumonia with autoimmune features; HP, hypersensitivity pneumonitis; BMI, body mass index; COPD; chronic obstructive lung pulmonary disease; DM, diabetes mellitus; LDH, lactate dehydrogenase; KL-6, sialylated carbohydrate antigen Krebs von den Lungen-6; CRP, C-reactive protein; FVC, forced vital capacity; DLCO, diffusing capacity for carbon monoxide.

Supplemental Table S6.

| Characteristics                 | Excluded                                                      |                         | PF-ILD*                 |                        |                          |          |                        |                        |                        |         |
|---------------------------------|---------------------------------------------------------------|-------------------------|-------------------------|------------------------|--------------------------|----------|------------------------|------------------------|------------------------|---------|
|                                 | Lacking pulmonary function test after PF-ILD diagnosis (n=12) | Total (n=155)           | IPF                     |                        |                          | P value§ | Non-IPF                |                        |                        | P value |
|                                 |                                                               |                         | Total (n=61)            | Antifibrotic (n=42)    | No-antifibrotic (n=19)   |          | Total (n=94)           | Antifibrotic (n=34)    | No-antifibrotic (n=60) |         |
| <b>Characteristics</b>          |                                                               |                         |                         |                        |                          |          |                        |                        |                        |         |
| Sex, male                       | 10 (83.33)‡                                                   | 105 (67.74)             | 45 (73.77)              | 29 (69.05)             | 16 (84.21)               | 0.3464   | 60 (63.83)             | 24 (70.59)             | 36 (60.0)              | 0.5007  |
| Age (years)                     | 71.0<br>(62.5-74.25)                                          | 71.0<br>(64.0-75.0)     | 73.0<br>(68.5-77.0)     | 71.5<br>(66.75-76.25)  | 74<br>(71.0-78.0)        | 0.1467   | 69<br>(60.8-74.0)      | 69.5<br>(63.25-74)     | 69<br>(62.5-74.0)      | 0.6086  |
| BMI                             | 22.36<br>(21.70-24.81)                                        | 22.83<br>(21.13-25.39)  | 23.73<br>(21.77-26.31)  | 23.81<br>(21.63-26.71) | 23.36<br>(21.83-25.39)   | 0.8274   | 22.45<br>(20.21-25.07) | 23.57<br>(20.98-26.47) | 21.91<br>(19.86-24.26) | 0.0156  |
| COPD                            | 3 (25.00)                                                     | 21 (13.54)              | 7 (14.06)               | 5 (11.9)               | 2 (10.53)                | 0.8816   | 14 (12.62)             | 7 (20.59)              | 7 (11.48)              | 0.2341  |
| DM                              | 0 (0.00)                                                      | 24 (15.48)              | 11 (17.19)              | 5 (11.9)               | 6 (31.58)                | 0.1216   | 13 (12.62)             | 3 (8.82)               | 10 (14.49)             | 0.7168  |
| <b>Serological examination</b>  |                                                               |                         |                         |                        |                          |          |                        |                        |                        |         |
| Monocyte count                  | 336<br>(286.4-693.4)                                          | 432.9<br>(337.9-539)    | 420.5<br>(333.3-527.1)  | 402.6<br>(329.67-539)  | 439.1<br>(339.8-498.4)   | 0.8292   | 433.2<br>(340.7-552)   | 437.7<br>(379.8-554.7) | 429.2<br>(302.1-551.5) | 0.3584  |
| LDH                             | 218.5<br>(161.5-259.3)                                        | 217<br>(194.5-250.3)    | 216<br>(193.5-260.0)    | 214<br>(192-248)       | 217<br>(196.5-274)       | 0.5564   | 217.5<br>(193.8-245.5) | 213<br>(181.5-246.5)   | 224.5<br>(200.5-250.3) | 0.3037  |
| KL-6                            | 647.5<br>(403.2-1496.8)                                       | 898.5<br>(590.7-1357.2) | 948.3<br>(700.4-1554.8) | 916.4<br>(740.5-1606)  | 1058.9<br>(614.5-1510.6) | 0.9645   | 852<br>(564-1269)      | 829<br>(598.6-1423.1)  | 871<br>(464.1-1166.6)  | 0.2519  |
| CRP                             | 0.30 (0.1-1.28)                                               | 0.16 (0.1-0.36)         | 0.16 (0.1-0.43)         | 0.16 (0.1-0.32)        | 0.19 (0.11-0.46)         | 0.4010   | 0.15 (0.1-0.35)        | 0.18 (0.1-0.35)        | 0.14 (0.07-0.35)       | 0.5074  |
| <b>Pulmonary function</b>       |                                                               |                         |                         |                        |                          |          |                        |                        |                        |         |
| FVC                             | 2.13<br>(1.72-2.57)                                           | 2.31<br>(1.81-2.85)     | 2.29<br>(1.91-2.84)     | 2.29<br>(1.89-2.87)    | 2.35<br>(1.91-2.83)      | 0.9438   | 2.33<br>(1.79-2.89)    | 2.33<br>(1.96-2.77)    | 2.41<br>(1.75-3.07)    | 0.6193  |
| %FVC                            | 84.15<br>(72.7-92.78)                                         | 82.1<br>(68.0-91.6)     | 84.3<br>(71.8-93.15)    | 86.55<br>(72.83-94.0)  | 84.1<br>(68.9-91.7)      | 0.2916   | 78.8<br>(65.1-90.4)    | 79.3<br>(63.0-90.75)   | 79.2<br>(65.6-89.6)    | 0.5710  |
| DLCO (n=125)                    | 9.51<br>(3.64-15.26)                                          | 10.07<br>(7.47-12.0)    | 9.96<br>(7.88-12.0)     | 11.04<br>(8.41-12.74)  | 8.47<br>(7.07-10.36)     | 0.0226   | 10.07<br>(7.33-11.98)  | 9.69<br>(7.26-11.76)   | 10.29<br>(7.49-12.64)  | 0.6082  |
| %DLCO (n=125)                   | 64.26<br>(20.20-79.85)                                        | 58.5<br>(44.6-75.1)     | 59.17<br>(46.65-77.44)  | 69.66<br>(49.05-80.97) | 47.8<br>(41.4-57.77)     | 0.0280   | 58.5<br>(42.95-72.8)   | 52.8<br>(40.03-71.75)  | 61.5<br>(43.73-74.68)  | 0.2074  |
| <b>Radiological findings</b>    |                                                               |                         |                         |                        |                          |          |                        |                        |                        |         |
| Honeycombing                    | 6 (50.0)                                                      | 59 (38.06)              | 34 (55.74)              | 22 (52.38)             | 12 (63.16)               | 0.5792   | 25 (26.6)              | 12 (35.29)             | 13 (21.67)             | 0.1452  |
| Traction bronchiectasis         | 5 (41.67)                                                     | 96 (61.94)              | 39 (63.93)              | 27 (64.29)             | 12 (63.16)               | 1.000    | 57 (58.25)             | 22 (64.71)             | 35 (58.33)             | 0.6614  |
| <b>Immunosuppressive agents</b> |                                                               |                         |                         |                        |                          |          |                        |                        |                        |         |
| Glucocorticoids (PSL <10mg/day) | 1 (8.33)                                                      | 11 (7.1)                | 0 (0.0)                 | 0 (0.0)                | 0 (0.0)                  | 1.000    | 11 (11.70)             | 3 (8.82)               | 8 (13.33)              | 0.7414  |
| Glucocorticoids (PSL ≥10mg/day) | 5 (41.67)                                                     | 18 (11.67)              | 6 (9.84)                | 4 (9.52)               | 2 (10.53)                | 1.000    | 12 (12.77)             | 5 (14.71)              | 7 (11.67)              | 0.7515  |
| Immunosuppressant               | 1 (8.33)                                                      | 15 (9.68)               | 2 (3.28)                | 1 (2.38)               | 1 (5.36)                 | 0.5295   | 13 (13.83)             | 6 (17.65)              | 7 (11.67)              | 0.5360  |

**Supplemental Table S6.** Baseline characteristics of patients with PF-ILD between the antifibrotic and no antifibrotic group at PF-ILD diagnosis and except the patients with lacking PFTs after PF-ILD diagnosis.

‡Data are shown as n (%) or median (interquartile range).

§Differences among continuous variables were assessed using Welch's t-test for monocyte count and pulmonary function tests (PFTs) and the Wilcoxon rank sum test for other variables; differences among categorical variables were assessed using the  $\chi^2$  test or Fisher's exact test, as appropriate.

\*Abbreviations: PF-ILD, progressive fibrosing interstitial lung disease; IPF, idiopathic pulmonary fibrosis; BMI, body mass index; COPD, chronic obstructive lung pulmonary disease; DM, diabetes mellitus; LDH, lactate dehydrogenase; KL-6, sialylated carbohydrate antigen Krebs von den Lungen-6; CRP, C-reactive protein; FVC, forced vital capacity; DLCO, diffusing capacity for carbon monoxide; PSL, prednisolone.

**Supplemental Table S7.**

|                                  | PF-ILD*          |               |                                                                                                 |                       |              |                              |          | P value§ |
|----------------------------------|------------------|---------------|-------------------------------------------------------------------------------------------------|-----------------------|--------------|------------------------------|----------|----------|
|                                  | Total<br>(n=167) | IPF<br>(n=64) | IIPs other than IPF (n=49)<br>NSIP (n=19), PPFE (n=2)<br>Unclassified (n=26),<br>COP (n=2)      | Non-IPF (n=103)       |              |                              |          |          |
|                                  |                  |               | CTD-ILD (n=31),<br>SSc (n=12),<br>RA (n=8), IM <sup>1</sup> (n=7),<br>Others <sup>2</sup> (n=4) | IPAF<br>(n=7)         | HP<br>(n=10) | Others <sup>3</sup><br>(n=6) |          |          |
| Total death                      | 52 (31.14) ‡     | 22 (34.38)    | 17 (34.69)                                                                                      | 8 (25.81)             | 2 (28.57)    | 3 (30.0)                     | 0 (0.00) | 0.6287   |
| Respiratory failure <sup>4</sup> | 35 (23.44)       | 15 (23.44)    | 12 (24.49)                                                                                      | 4 (12.90)             | 1 (14.29)    | 3 (30.0)                     | 0 (0.00) | 0.6029   |
| Lung cancer                      | 4 (2.4)          | 1 (1.56)      | 2 (4.08)                                                                                        | 0 (0.00)              | 1 (14.29)    | 0 (0.00)                     | 0 (0.00) | 0.2861   |
| Others                           | 5 (2.99)         | 1 (1.56)      | 1 (2.04)                                                                                        | 3 (9.68) <sup>5</sup> | 0 (0.00)     | 0 (0.00)                     | 0 (0.00) | 0.3871   |
| Unknown                          | 8 (4.79)         | 5 (7.81)      | 2 (3.92)                                                                                        | 1 (3.23)              | 0 (0.00)     | 0 (0.00)                     | 0 (0.00) | 0.9157   |

**Supplemental Table S7.** The cause of death in each disease groups.

<sup>1</sup>Dermatomyositis (n=4), Polymyositis (n=3)

<sup>2</sup>Microscopic Polyangiitis (n=2), Mixed Connective Tissue Disease (n=1), Systemic lupus erythematosus (n=1).

<sup>3</sup>Exposure-related ILD (n=5), Sarcoidosis (n=1)

<sup>4</sup>Respiratory failure was defined as a disease progression, acute exacerbation, and complication of ILD other than lung cancer (e.g pneumothorax).

<sup>5</sup>Colon cancer (n=1), Heart failure (n=1), infection (n=1)

‡Data are shown as n (%).

§Differences among continuous variables were assessed using the one-way analysis of variance; differences among categorical variables were assessed using the  $\chi^2$  test or Fisher's exact test, as appropriate.

\*Abbreviations: IPF, idiopathic pulmonary fibrosis; IIPs, idiopathic interstitial pneumonias; NSIP, non-specific interstitial pneumonia; PPFE, pleuroparenchymal fibroelastosis; COP, cryptogenic organizing pneumonia; CTD-ILD, connective tissue disease-interstitial lung disease; SSc, systemic sclerosis; IM, inflammatory myopathies; RA, rheumatoid arthritis; IPAF, interstitial pneumonia with autoimmune features; HP, hypersensitivity pneumonitis.

**Supplemental Table S8.**

| Antifibrotic agents | IPF* (n=42) | non-IPF (n=34) |
|---------------------|-------------|----------------|
| Nintedanib          | 17          | 20             |
| Pirfenidone         | 25          | 14             |

**Supplemental Table S8.** The prescription between nintedanib and pirfenidone in each group.

\*Abbreviations: IPF, idiopathic pulmonary fibrosis.
