# Supplementary material for: Real-world impact of antifibrotics on prognosis in patients with progressive fibrosing interstitial lung disease
Source: HighWire-hosted journal article supplement (doi:10.1136/rmdopen-2022-002667), 2023-01-01
Supplement: rmdopen-2022-002667supp003_data_supplement.pdf [file rmdopen-2022-002667supp003_data_supplement.pdf]

## Supplemental Figure S2.

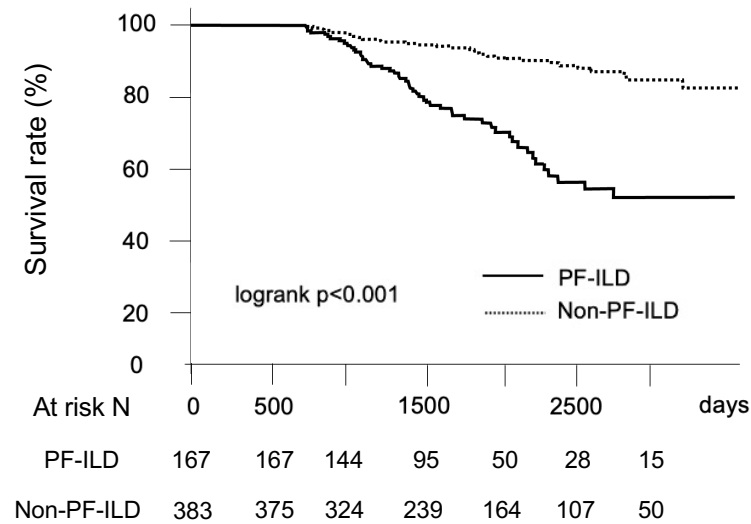

Survival estimates were performed using the Kaplan–Meier method and compared by log-rank test between PF-ILD (n=167) and non-PF-ILD (n=383).

Abbreviations: PF-ILD, progressive fibrosing interstitial lung disease.
