# Supplementary material for: Real-world impact of antifibrotics on prognosis in patients with progressive fibrosing interstitial lung disease
Source: HighWire-hosted journal article supplement (doi:10.1136/rmdopen-2022-002667), 2023-01-01
Supplement: rmdopen-2022-002667supp004_data_supplement.pdf [file rmdopen-2022-002667supp004_data_supplement.pdf]

## Supplemental Figure S3.

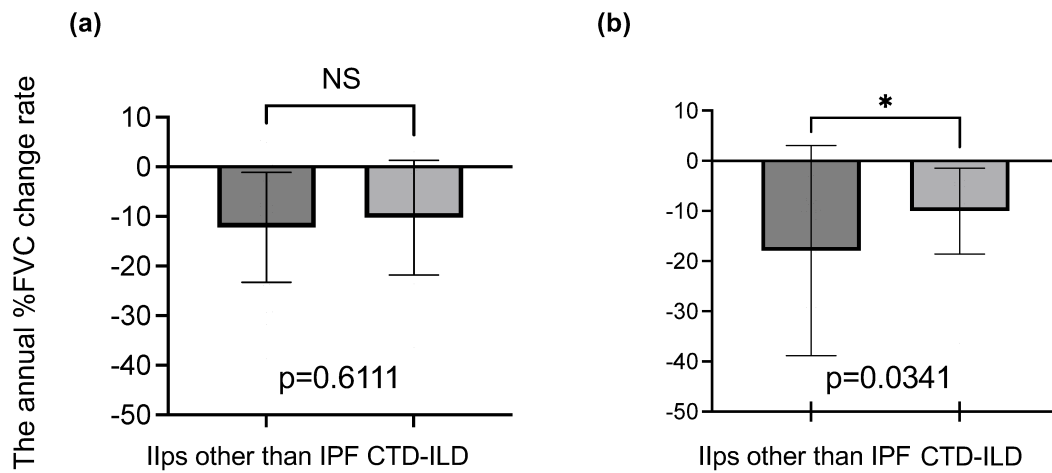

The annual %FVC change rate between IIPs other than IPF and CTD-ILD in the no antifibrotic group for (a) the 1st year after PF-ILD diagnosis and (b) the observation period after PF-ILD diagnosis.

\*Differences were assessed using the Wilcoxon rank sum test.

Abbreviations: %FVC; percentage of forced vital capacity; NS, not significant; IIPs, idiopathic interstitial pneumonias; IPF, idiopathic pulmonary fibrosis; CTD-ILD, connective tissue disease-related interstitial lung disease.
